# Supplementary material for: One-Step Nucleic Acid Amplification in Breast Cancer Sentinel Lymph Node: A Single Institutional Experience and a Short Review
Source: PubMed Central journal article supplement (PMC4469115; doi:10.3389/fmed.2015.00037), 2015-06-04
Supplement: table_1.pdf [file table_1.pdf]

**Supplementary Table 1.** A comparison between OSNA- and TNM-based criteria with corresponding diagnostic categories.

| <b>OSNA-based criteria (CK19 mRNA copies/<math>\mu</math>L)</b> | <b>TNM-based criteria (size of metastatic focus)</b> | <b>Daignostic categories of SLN status OSNA / TNM</b> |
|-----------------------------------------------------------------|------------------------------------------------------|-------------------------------------------------------|
| $\geq 5000$                                                     | $>2$ mm                                              | 2+ / macrometastasis                                  |
| 250-4999                                                        | 0,2-2 mm                                             | 1+ / micrometastasis                                  |
| $<250$                                                          | $<0,2$ mm                                            | - / negative                                          |
