# Supplementary material for: One-Step Nucleic Acid Amplification in Breast Cancer Sentinel Lymph Node: A Single Institutional Experience and a Short Review
Source: PubMed Central journal article supplement (PMC4469115; doi:10.3389/fmed.2015.00037), 2015-06-04
Supplement: table_2.pdf [file table_2.pdf]

**Supplementary Table 2.** Performance of morphological (PO-PS and IO-FS) and molecular (OSNA) techniques in SLN evaluation. Experience at Humanitas Cancer Center.

|                                                       | <b>PO-PS</b>        | <b>IO-FS</b>       | <b>OSNA</b>          |
|-------------------------------------------------------|---------------------|--------------------|----------------------|
| <b>Number of patients</b>                             | <b>540</b>          | <b>390</b>         | <b>1122</b>          |
| <b>Patients with positive SLN</b>                     | <b>162 (30%)</b>    | <b>87 (22%)</b>    | <b>322 (29%)</b>     |
| - macromets                                           | 100 (62%)           | 64 (74%)           |                      |
| - OSNA 2+                                             |                     |                    | 177 (55%)            |
| - micromets                                           | 62 (38%)            | 23 (26%)           |                      |
| -OSNA 1+                                              |                     |                    | 145 (45%)            |
| <b>Patients with additional nodal mets after ALND</b> | <b>53/162 (33%)</b> | <b>27/87 (31%)</b> | <b>91/272* (33%)</b> |
| - macromets                                           | 43/100 (43%)        | 23/64 (36%)        |                      |
| - OSNA 2+                                             |                     |                    | 76/175 (43%)         |
| - micromets                                           | 10/62 (16%)         | 4/23 (17%)         |                      |
| - OSNA 1+                                             |                     |                    | 15/97 (15%)          |

\*2 patients after 2+ and 48 after 1+ refused complete nodal dissection following data from Galimberti et al (5).
