# Supplementary material for: One-Step Nucleic Acid Amplification in Breast Cancer Sentinel Lymph Node: A Single Institutional Experience and a Short Review
Source: PubMed Central journal article supplement (PMC4469115; doi:10.3389/fmed.2015.00037), 2015-06-04
Supplement: table_3.pdf [file table_3.pdf]

**Supplementary Table 3.** Rate of positive SLN, distribution of 2+ and 1+ cases, and their impact on nodal mets after complete axillary dissection: data from largest OSNA studies.

| <b>Reference</b>      | <b>Cases</b> | <b>Positive SLN</b> | <b>++</b> | <b>+</b> | <b>ALND involvement<br/>in pts with SLN 2+</b> | <b>ALND involvement<br/>in pts with SLN 1+</b> |
|-----------------------|--------------|---------------------|-----------|----------|------------------------------------------------|------------------------------------------------|
| Deambrogio et al (22) | 1080         | 22%                 | 49%       | 51%      | 47%                                            | 18%                                            |
| Teramoto et al (23)   | 833          | 21%                 | 60%       | 40%      | 43%                                            | 11%                                            |
| Babar et al (24)      | 859          | 31%                 | 47%       | 38% *    | 35%                                            | 16%                                            |
| Espinosa et al (25)   | 306          | 35%                 | 56%       | 41% *    | 37%                                            | 18%                                            |
| Present series        | 1122         | 29%                 | 55%       | 45%      | 43%                                            | 15%                                            |

\* these data did not include diluted samples, separately reported in these papers.
